# Supplementary material for: Metal-like electrical conductivity in LaxSr2−xTiMoO6oxides for high temperature thermoelectric power generation
Source: Royal Society of Chemistry journal article supplement (doi:10.1039/c7dt00848a), 2017-01-01
Supplement: c7dt00848a1.pdf [file c7dt00848a1.pdf]

## Supporting information

### **Metal-like electrical conductivity in $\text{La}_x\text{Sr}_{2-x}\text{TiMoO}_6$ oxides for high temperature thermoelectric power generation**

Mandvi Saxena, and Tanmoy Maiti

Plasmonics and Perovskites Laboratory, Department of Materials Science and Engineering,  
Indian Institute of Technology Kanpur, UP 208016, India.

Figure S1 shows the Rietveld refinement of all  $\text{La}_x\text{Sr}_{2-x}\text{TiMoO}_6$  samples using cubic structure with  $\text{Pm}\bar{3}\text{m}$  space group. It is evident from Figure-S1 that all the LSTM compositions show good fit to cubic structure with  $\text{Pm}\bar{3}\text{m}$  space group. To demonstrate quality of our Rietveld refinement, Figure-S2 is appended below showing the Rietveld refinement of (111) and (200) pseudocubic profile fitting.

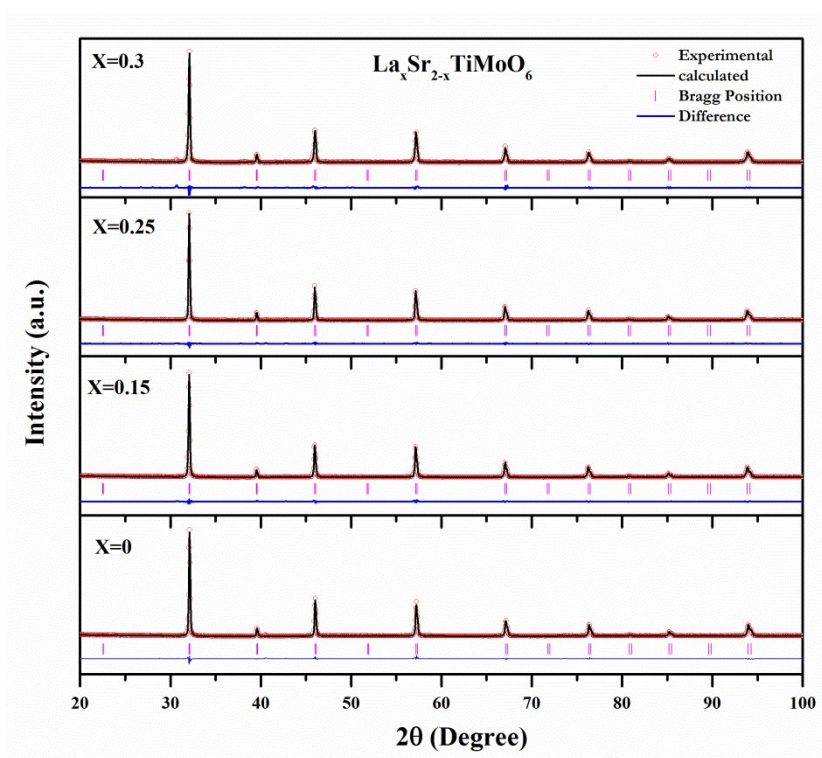

Figure S1. Rietveld refinement of XRD data for  $\text{La}_x\text{Sr}_{2-x}\text{TiMoO}_6$  with  $x=0, 0.15, 0.25, 0.3$  using the Cubic symmetry of space group  $\text{Pm}\bar{3}\text{m}$ .

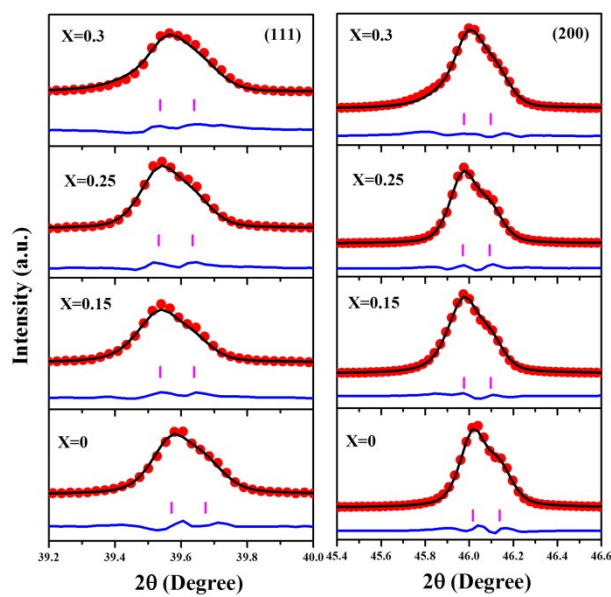

Figure S2. Rietveld refinement of (111) and (200) XRD peaks for  $\text{La}_x\text{Sr}_{2-x}\text{TiMoO}_6$  with  $x=0, 0.15, 0.25, 0.3$  using the Cubic symmetry of space group  $\text{Pm}\bar{3}\text{m}$ .
